# Supplementary material for: Carbon nitride–TiO2 hybrid modified with hydrogenase for visible light driven hydrogen production
Source: PubMed Central journal article supplement (PMC5512016; doi:10.1039/c5sc02017d), 2015-06-29
Supplement: SC-006-C5SC02017D-s001.pdf [file SC-006-C5SC02017D-s001.pdf]

## Electronic Supplementary Information (ESI)

### Carbon Nitride-TiO<sub>2</sub> Hybrid Modified with Hydrogenase for Visible Light Driven Hydrogen Production

*Christine A. Caputo,<sup>a</sup> Lidong Wang,<sup>b</sup> Radim Beranek,<sup>b</sup> and Erwin Reisner<sup>a\*</sup>*

<sup>a</sup>Christian Doppler Laboratory for Sustainable SynGas Chemistry, Department of Chemistry, University of Cambridge, Lensfield Road, Cambridge CB2 1EW, UK

<sup>b</sup>Faculty of Chemistry and Biochemistry, Ruhr-Universität Bochum, Universitätstr. 150, 44780 Bochum, Germany

To whom correspondence should be addressed: email: [reisner@ch.cam.ac.uk](mailto:reisner@ch.cam.ac.uk)

#### Table of Contents:

|                      | PAGE |
|----------------------|------|
| Experimental Section | S2   |
| References           | S5   |
| Tables S1 to S2      | S6   |
| Figures S1 to S9     | S7   |

## Experimental Section

*Materials.* Chemicals were purchased from commercial suppliers and used without further purification. Reagents for the analytical part of the work were of the highest available purity. The [NiFeSe]-hydrogenase from *Desulfomicrobium baculatum* (*Dmb* [NiFeSe]-H<sub>2</sub>ase) was purified by a previously published method.<sup>1</sup> The preparation has a specific activity of 2115  $\mu\text{mol H}_2 \text{ min}^{-1} \text{ mg}^{-1}$ ,<sup>2</sup> and the stock enzyme solution was diluted with an aqueous TEOA solution (0.1 M, pH 7) before photocatalytic experiments in an anaerobic glovebox. Polyheptazine (melon, CN<sub>x</sub>) was prepared by heating melamine at 500 °C for 2 hours.<sup>3</sup> Note that the CN<sub>x</sub> employed in this study displayed the same activity than a previously used CN<sub>x</sub> from a different source.<sup>4</sup> CN<sub>x</sub>-TiO<sub>2</sub> powders were synthesised as previously described.<sup>3b</sup> In short, 0.5 g of TiO<sub>2</sub> (Hombikat UV 100, Sachtleben Chemie, Germany, anatase, specific surface area (BET) 300 m<sup>2</sup> g<sup>-1</sup>, crystallite size < 10 nm) was placed into a Schlenk tube connected via an adapter to a round-bottomed flask containing urea (1 g), and heated in a muffle oven for 30 min at 425 °C. Powders were washed and centrifuged with water three times and then dried at 60 °C overnight, giving samples denoted as CN<sub>x</sub>-TiO<sub>2</sub>. The specific surface area (BET) of CN<sub>x</sub>-TiO<sub>2</sub> and of CN<sub>x</sub> was 111 m<sup>2</sup> g<sup>-1</sup> and 8 m<sup>2</sup> g<sup>-1</sup>, respectively. CN<sub>x</sub>-ZrO<sub>2</sub> was prepared using an analogous procedure with a urea heat treatment at 600 °C starting with ZrO<sub>2</sub> powders. ZrO<sub>2</sub> was prepared by basic hydrolysis (pH 9) of ZrOCl<sub>2</sub> (1 M) solutions, followed by filtration, drying, and calcination at 500 °C for 2 hours.

*Photocatalysis Experiments.* A standard photocatalytic experimental set-up was used as follows: CN<sub>x</sub>-TiO<sub>2</sub> (5 mg) was added to a borosilicate glass tube containing a magnetic stir bar (total volume 7.74 mL). An aqueous electron donor solution (usually 0.1 M, 2.98 mL) was then added and the vessel sealed with a rubber septum. The suspension was sonicated for 20 min under air, followed by purging the suspension for 15 min with 2% CH<sub>4</sub> in N<sub>2</sub>. *Dmb* [NiFeSe]-H<sub>2</sub>ase was then added

(16.5  $\mu\text{L}$ ; 3 mM) and then the vial was purged with 2%  $\text{CH}_4$  in  $\text{N}_2$  for an additional 5 min. The vials were then placed in a water-jacketed glass rack and irradiated with 1 sun using a Xe lamp (Newport Oriel Solar Light Simulator, 1000 W,  $100 \text{ mW cm}^{-2}$ ) with an air mass 1.5 global (AM 1.5G) filter in the absence or presence of a 420 nm or 455 nm UV-broad band cut-off filters (UQG Optics), with stirring. Headspace gases were sampled using Hamilton air-tight syringes by injecting 20  $\mu\text{L}$  into the gas chromatograph (Agilent 7890A Series gas chromatograph equipped with a 5 Å molecular sieve column,  $\text{N}_2$  carrier gas  $3 \text{ mL (min)}^{-1}$  and an oven temperature of 45 °C and a thermal conductivity detector) at regular intervals.  $\text{H}_2$  produced was quantified by comparison to the  $\text{CH}_4$  internal standard.

*Centrifugation Experiments.* Photocatalytic experiments were set up by pre-loading the  $\text{H}_2\text{ase}$  (50 pmol) onto  $\text{CN}_x\text{-TiO}_2$  (5 mg) by stirring the suspension under  $\text{N}_2$  for 15 min in an aqueous EDTA solution (0.1 M, 1 mL). The suspension was then transferred to centrifuge tubes and spun down for 10 min (10,000 rpm). The supernatant was decanted (in air) and the pellet re-suspended in an aqueous EDTA solution (0.1 M, pH 6) and vortexed for 2 min. The suspension was returned to the borosilicate glass vials, sealed and purged with 2%  $\text{CH}_4$  in  $\text{N}_2$  for 10 min. The vessels were irradiated under 1 sun for 4 h and  $\text{H}_2$  production monitored by gas chromatography.

*Calculation of Hydrogenase Loading.* The enzyme loading onto  $\text{CN}_x\text{-TiO}_2$  was calculated based on the BET surface area of  $111 \text{ m}^2 \text{ g}^{-1}$ , a crystallite size of  $r = 5 \times 10^{-9} \text{ m}$  and a conservative estimate that approximately one-quarter of the surface area of  $\text{CN}_x\text{-TiO}_2$  is exposed  $\text{TiO}_2$  that is accessible for the enzyme to adsorb.  $SA$  is surface area,  $A$  is Avogadro's number,  $n$  is the number of moles of hydrogenase used,  $m$  the number of particles of  $\text{CN}_x\text{-TiO}_2$  used.

$$\begin{aligned}
\text{Number of CN}_x\text{TiO}_2 \text{ particles, } m &= \frac{(\text{BET of CN}_x\text{TiO}_2)(\text{g CN}_x\text{TiO}_2)(\% \text{ SA exposed TiO}_2)}{4\pi r^2} \\
&= \frac{(111 \text{ m}^2\text{g}^{-1})(0.005 \text{ g})(0.25)}{4\pi(5 \times 10^{-9})^2 \text{ m}^2} \\
&= 4.4 \times 10^{14} \text{ particles} \\
\therefore \text{Hydrogenase Loading} &= \frac{nA}{m \text{ CN}_x\text{TiO}_2 \text{ particles}} \\
&= \frac{(50 \times 10^{-12} \text{ mol H}_2\text{ase})(6.02 \times 10^{23} \text{ H}_2\text{ase mol}^{-1})}{4.4 \times 10^{14} \text{ particles}} \\
&= 0.1 \text{ H}_2\text{ase enzymes per particle of CN}_x\text{TiO}_2
\end{aligned}$$

*Treatment of Data.* All analytical measurements were performed at least in triplicate. A minimum standard deviation ( $\sigma$ ) of 10% was assumed for all experiments even where triplicate runs gave a  $\sigma$  of less than 10%. The solar light source and the gas chromatograph were calibrated regularly to ensure reproducibility.

*Calculation of External Quantum Efficiency (EQE).* Hydrogen generation in a quartz cuvette containing excess H<sub>2</sub>ase (50 pmol) with CN<sub>x</sub>-TiO<sub>2</sub> (1.7 mg) suspended in EDTA (1 mL, 0.1 M, pH 6) was driven by blue light ( $\lambda = 400 \pm 10$  nm) of intensity  $I = 4.34 \text{ mW cm}^{-2}$  and UV light ( $\lambda = 360 \pm$  nm) of intensity  $I = 2.49 \text{ mW cm}^{-2}$  at 25 °C using narrow bandpass filters (THOR Labs). The EQE can be calculated with the following formula:

$$\text{EQE (\%)} = (2 \cdot n_{\text{H}_2} \cdot N_A \cdot h \cdot c) / (t_{\text{irr}} \cdot \lambda \cdot I \cdot A) \cdot 100$$

Where  $n_{\text{H}_2}$  is the moles of H<sub>2</sub> photo-generated,  $N_A$  is the Avogadro constant,  $h$  is the Planck constant,  $c$  is the speed of light,  $t_{\text{irr}}$  is the irradiation time, and  $A$  is the irradiated area of the photoreactor (1 cm<sup>2</sup>).



## References

- 1 A. Volbeda, P. Amara, M. Iannello, A. L. De Lacey, C. Cavazza and J. C. Fontecilla-Camps, *Chem. Commun.*, 2013, **49**, 7061-7063.
- 2 E. C. Hatchikian, M. Bruschi and J. Le Gall, *Biochem. Biophys. Res. Commun.*, 1978, **82**, 451-461.
- 3 (a) B. V. Lotsch, M. Döblinger, J. Sehnert, L. Seyfarth, J. Senker, O. Oeckler and W. Schnick, *Chem. Eur. J.*, 2007, **13**, 4969-4980; (b) M. Bledowski, L. Wang, A. Ramakrishnan, O. V. Khavryuchenko, V. D. Khavryuchenko, P. C. Ricci, J. Strunk, T. Cremer, C. Kolbeck and R. Beranek, *Phys. Chem. Chem. Phys.*, 2011, **13**, 21511-21519.
- 4 C. A. Caputo, M. A. Gross, V. W. Lau, C. Cavazza, B. V. Lotsch and E. Reisner, *Angew. Chem. Int. Ed.*, 2014, **53**, 11538-11542.

**Table S1.** Solar light driven H<sub>2</sub> production with *Dmb* [NiFeSe]-H<sub>2</sub>ase (50 pmol) on CN<sub>x</sub>-TiO<sub>2</sub> (5 mg). Experiments were performed using CN<sub>x</sub>-TiO<sub>2</sub> or other light harvesting particles (5 mg) in aqueous ascorbic acid (AA; 0.1 M), triethanolamine (TEOA; 0.1 M), EDTA (0.1 M) or citric acid (CA; 0.1 M) solution with H<sub>2</sub>ase as a catalyst. Entry 6 represents optimised standard conditions under AM 1.5 G solar light irradiation ( $\lambda > 300$  nm).

| Entry                                                         | H <sub>2</sub> ase / pmol; light absorber | pH   | Electron donor                | TON (4 h) $\pm \sigma$ / mol H <sub>2</sub> H <sub>2</sub> ase <sup>-1</sup> | H <sub>2</sub> (4 h) $\pm \sigma$ / $\mu$ mol | Activity (1 h) / $\mu$ mol H <sub>2</sub> (g CN <sub>x</sub> -TiO <sub>2</sub> ) <sup>-1</sup> h <sup>-1</sup> | TOF (1 h) $\pm \sigma$ / h <sup>-1</sup> |
|---------------------------------------------------------------|-------------------------------------------|------|-------------------------------|------------------------------------------------------------------------------|-----------------------------------------------|----------------------------------------------------------------------------------------------------------------|------------------------------------------|
| <b>Different Electron Donors (UV-vis irradiation)</b>         |                                           |      |                               |                                                                              |                                               |                                                                                                                |                                          |
| 1                                                             | 50; CN <sub>x</sub> -TiO <sub>2</sub>     | 6    | AA                            | 762 $\pm$ 72                                                                 | 0.04 $\pm$ 0.01                               | 5 $\pm$ 1                                                                                                      | 516 $\pm$ 52                             |
| 2                                                             | 50; CN <sub>x</sub> -TiO <sub>2</sub>     | 10.5 | TEOA                          | 2378 $\pm$ 234                                                               | 0.12 $\pm$ 0.01                               | 9 $\pm$ 1                                                                                                      | 959 $\pm$ 96                             |
| 3                                                             | 50; CN <sub>x</sub> -TiO <sub>2</sub>     | 7    | EDTA                          | 52960 $\pm$ 5296                                                             | 2.65 $\pm$ 0.27                               | 132 $\pm$ 13                                                                                                   | 13217 $\pm$ 1322                         |
| 4                                                             | 50; CN <sub>x</sub> -TiO <sub>2</sub>     | 6    | CA                            | 7032 $\pm$ 1380                                                              | 0.35 $\pm$ 0.07                               | 21 $\pm$ 3                                                                                                     | 2097 $\pm$ 397                           |
| <b>Variation of pH values (UV-vis irradiation)</b>            |                                           |      |                               |                                                                              |                                               |                                                                                                                |                                          |
| 5                                                             | 50; CN <sub>x</sub> -TiO <sub>2</sub>     | 5    | EDTA                          | 111491 $\pm$ 14138                                                           | 5.57 $\pm$ 0.59                               | 262 $\pm$ 39                                                                                                   | 26273 $\pm$ 3989                         |
| 6                                                             | 50; CN <sub>x</sub> -TiO <sub>2</sub>     | 6    | EDTA                          | 116953 $\pm$ 11695                                                           | 5.85 $\pm$ 0.59                               | 279 $\pm$ 28                                                                                                   | 27928 $\pm$ 2793                         |
| 7                                                             | 50; CN <sub>x</sub> -TiO <sub>2</sub>     | 7    | EDTA                          | 52960 $\pm$ 5296                                                             | 2.65 $\pm$ 0.27                               | 132 $\pm$ 13                                                                                                   | 13217 $\pm$ 1322                         |
| <b>Visible Light Irradiation (<math>I &gt; 420</math> nm)</b> |                                           |      |                               |                                                                              |                                               |                                                                                                                |                                          |
| 8                                                             | 50; CN <sub>x</sub> -TiO <sub>2</sub>     | 6    | EDTA                          | 26277 $\pm$ 2628                                                             | 1.31 $\pm$ 0.13                               | 63 $\pm$ 6                                                                                                     | 6353 $\pm$ 635                           |
| 9                                                             | 50; TiO <sub>2</sub>                      | 6    | EDTA                          | 12327 $\pm$ 1699                                                             | 0.62 $\pm$ 0.08                               | 21 $\pm$ 2                                                                                                     | 2093 $\pm$ 222                           |
| 10                                                            | 50; CN <sub>x</sub>                       | 6    | EDTA                          | 2317 $\pm$ 304                                                               | 0.11 $\pm$ 0.01                               | 8 $\pm$ 1                                                                                                      | 845 $\pm$ 98                             |
| <b>Visible Light Irradiation (<math>I &gt; 455</math> nm)</b> |                                           |      |                               |                                                                              |                                               |                                                                                                                |                                          |
| 10                                                            | 50; CN <sub>x</sub> -TiO <sub>2</sub>     | 6    | EDTA                          | 5152 $\pm$ 1119                                                              | 0.26 $\pm$ 0.06                               | 11 $\pm$ 1                                                                                                     | 1096 $\pm$ 175                           |
| 11                                                            | 50; TiO <sub>2</sub>                      | 6    | EDTA                          | 993 $\pm$ 193                                                                | 0.05 $\pm$ 0.01                               | —                                                                                                              | —                                        |
| 12                                                            | 50; CN <sub>x</sub>                       | 6    | EDTA                          | — <sup>#</sup>                                                               | —                                             | —                                                                                                              | —                                        |
| <b>Control experiments (UV-vis irradiation)</b>               |                                           |      |                               |                                                                              |                                               |                                                                                                                |                                          |
| 13                                                            | 0; CN <sub>x</sub> -TiO <sub>2</sub>      | 6    | EDTA                          | —                                                                            | 0.35 $\pm$ 0.06                               | 10 $\pm$ 2                                                                                                     | —                                        |
| 14                                                            | 50; CN <sub>x</sub> -TiO <sub>2</sub>     | 6    | H <sub>2</sub> O <sup>†</sup> | 25587 $\pm$ 2558                                                             | 1.28 $\pm$ 0.13                               | 88 $\pm$ 9                                                                                                     | 8814 $\pm$ 881                           |
| 15                                                            | 50; no CN <sub>x</sub> -TiO <sub>2</sub>  | 6    | EDTA                          | —                                                                            | —                                             | —                                                                                                              | —                                        |
| 16                                                            | 50; TiO <sub>2</sub>                      | 6    | EDTA                          | 156308 $\pm$ 15630                                                           | 7.82 $\pm$ 0.76                               | 364 $\pm$ 54                                                                                                   | 36418 $\pm$ 5126                         |
| 17*                                                           | 50; CN <sub>x</sub> -ZrO <sub>2</sub>     | 6    | EDTA                          | 3450 $\pm$ 345                                                               | 0.17 $\pm$ 0.02                               | 4 $\pm$ 1                                                                                                      | 1054 $\pm$ 229                           |
| 18                                                            | 50; CN <sub>x</sub>                       | 6    | EDTA                          | 14852 $\pm$ 1485                                                             | 0.74 $\pm$ 0.07                               | 63 $\pm$ 7                                                                                                     | 6288 $\pm$ 649                           |

<sup>#</sup>No H<sub>2</sub> detected by GC measurements (limit of detection < 0.01%).

<sup>†</sup>A small amount of sacrificial electron donor TEOA was present in this experiment (16.5  $\mu$ L of 0.1 M TEOA H<sub>2</sub>ase buffer solution).

\*These experiments were carried out with 15 mg of CN<sub>x</sub>-ZrO<sub>2</sub>

**Table S2.** Solar light driven ( $\lambda > 300$  nm)  $\text{H}_2$  production using  $\text{CN}_x\text{-TiO}_2$  (5 mg) in an aqueous EDTA solution (0.1 M, pH 6) with *Dmb* [NiFeSe]- $\text{H}_2$ ase (50  $\mu\text{mol}$ ) under standard conditions after 1 h of irradiation in the presence of different neutral density filters.

| Entry                                                  | TON (4 h) $\pm \sigma$ /<br>mol $\text{H}_2$ $\text{H}_2\text{ase}^{-1}$ | $\text{H}_2$ (4 h) $\pm \sigma$ / $\mu\text{mol}$ | Activity /<br>$\mu\text{mol H}_2$ (g $\text{CN}_x\text{-TiO}_2$ ) $^{-1}$ h $^{-1}$ | TOF $\pm \sigma$ / h $^{-1}$ |
|--------------------------------------------------------|--------------------------------------------------------------------------|---------------------------------------------------|-------------------------------------------------------------------------------------|------------------------------|
| No additional neutral density filter was employed      |                                                                          |                                                   |                                                                                     |                              |
| <b>1</b>                                               | 105305 $\pm$ 10531                                                       | 5.3 $\pm$ 0.5                                     | 281 $\pm$ 28                                                                        | 28115 $\pm$ 2812             |
| A neutral density filter (Absorbance 50%) was employed |                                                                          |                                                   |                                                                                     |                              |
| <b>2</b>                                               | 96462 $\pm$ 9646                                                         | 4.8 $\pm$ 0.5                                     | 228 $\pm$ 23                                                                        | 22883 $\pm$ 2289             |
| A neutral density filter (Absorbance 80%) was employed |                                                                          |                                                   |                                                                                     |                              |
| <b>3</b>                                               | 46091 $\pm$ 6145                                                         | 2.3 $\pm$ 0.3                                     | 95 $\pm$ 12                                                                         | 9462 $\pm$ 1164              |

\*Vials were placed 10 cm closer to the light source thus may have been irradiated with a higher intensity of light than that used in standard experiments, thus a control with no filter was also measured. These measurements were performed in triplicate.

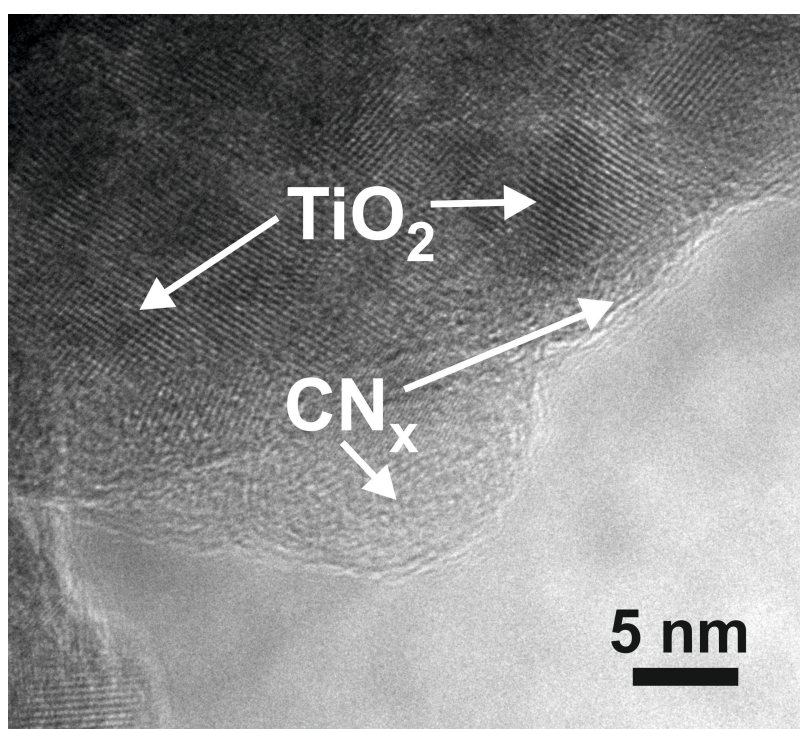

**Figure S1.** TEM of  $\text{CN}_x\text{-TiO}_2$  material clearly showing  $\text{CN}_x$  on the  $\text{TiO}_2$  surface. [M. Bledowski, L. Wang, S. Neubert, D. Mitoraj, R. Beranek, *J. Phys. Chem. C* **2014**, *118*, 18951-18961; M. Bledowski, L. Wang, S. Neubert, A. Ramakrishnan, R. Beranek, *J. Mater. Res.* **2013**, *28*, 411.]

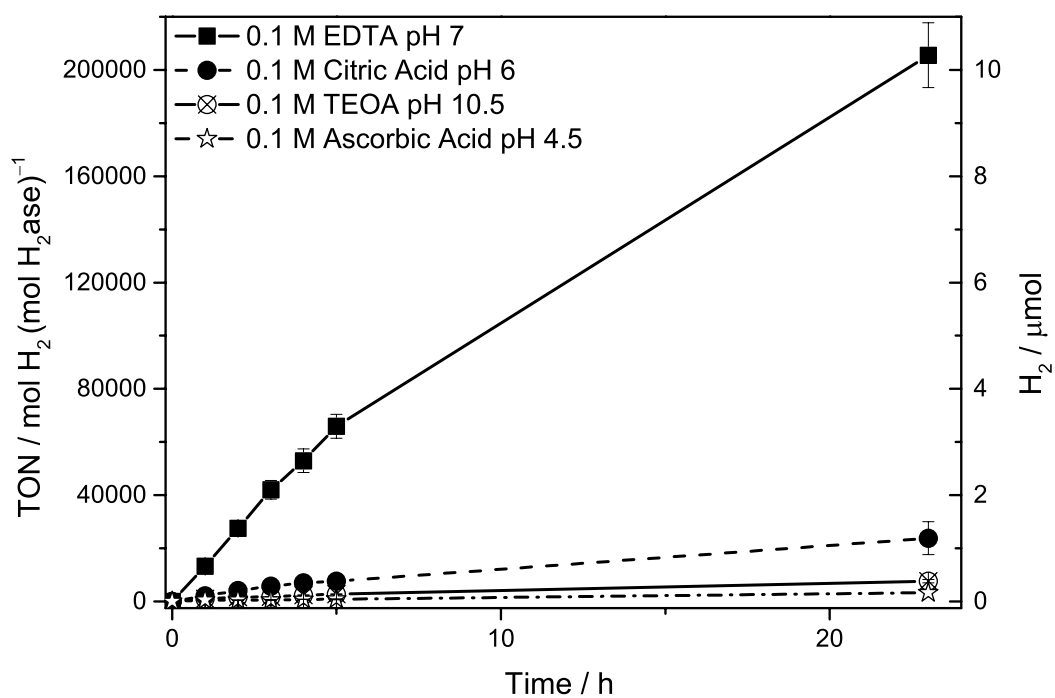

**Figure S2.** Photo-H<sub>2</sub> production with *Dmb* [NiFeSe]-H<sub>2</sub>ase (50 pmol) with CN<sub>x</sub>-TiO<sub>2</sub> (5 mg) in aqueous solutions with different sacrificial electron donors (0.1 M) during solar light irradiation (1 sun, 100 mW cm<sup>-2</sup>, λ > 300 nm) at 25 °C.

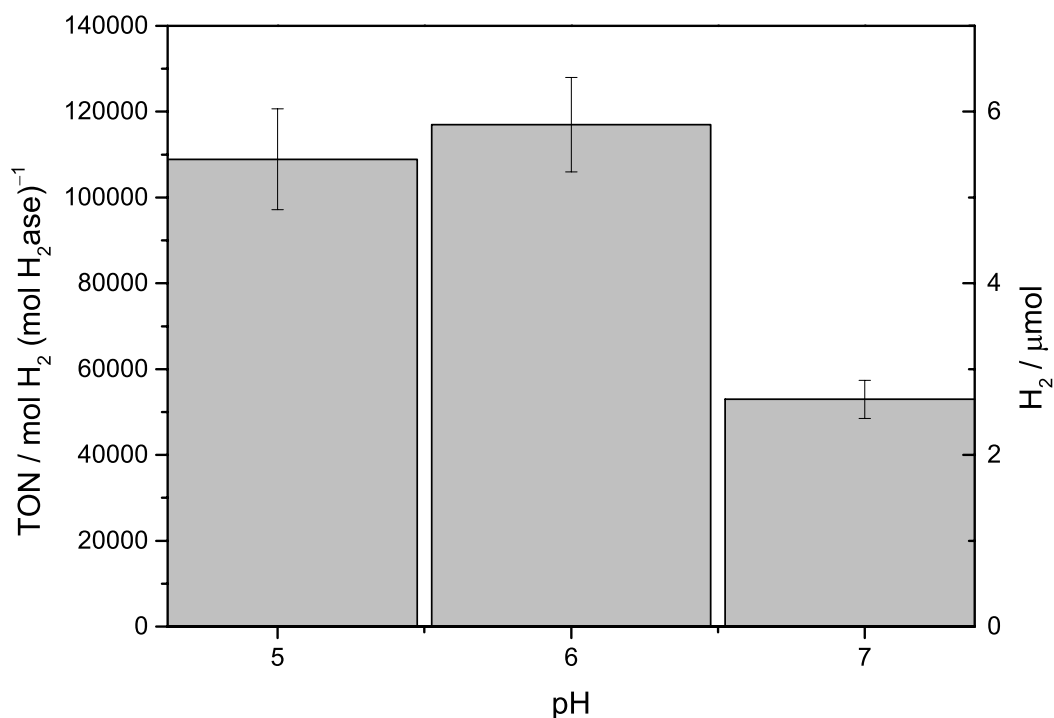

**Figure S3.** TON<sub>H<sub>2</sub>ase</sub> for photo-H<sub>2</sub> production with *Dmb* [NiFeSe]-H<sub>2</sub>ase (50 pmol) in an aqueous EDTA solution (0.1 M) with CN<sub>x</sub>-TiO<sub>2</sub> (5 mg) at different pH values obtained after 4 h of solar light irradiation (1 sun, 100 mW cm<sup>-2</sup>, λ > 300 nm) at 25 °C.

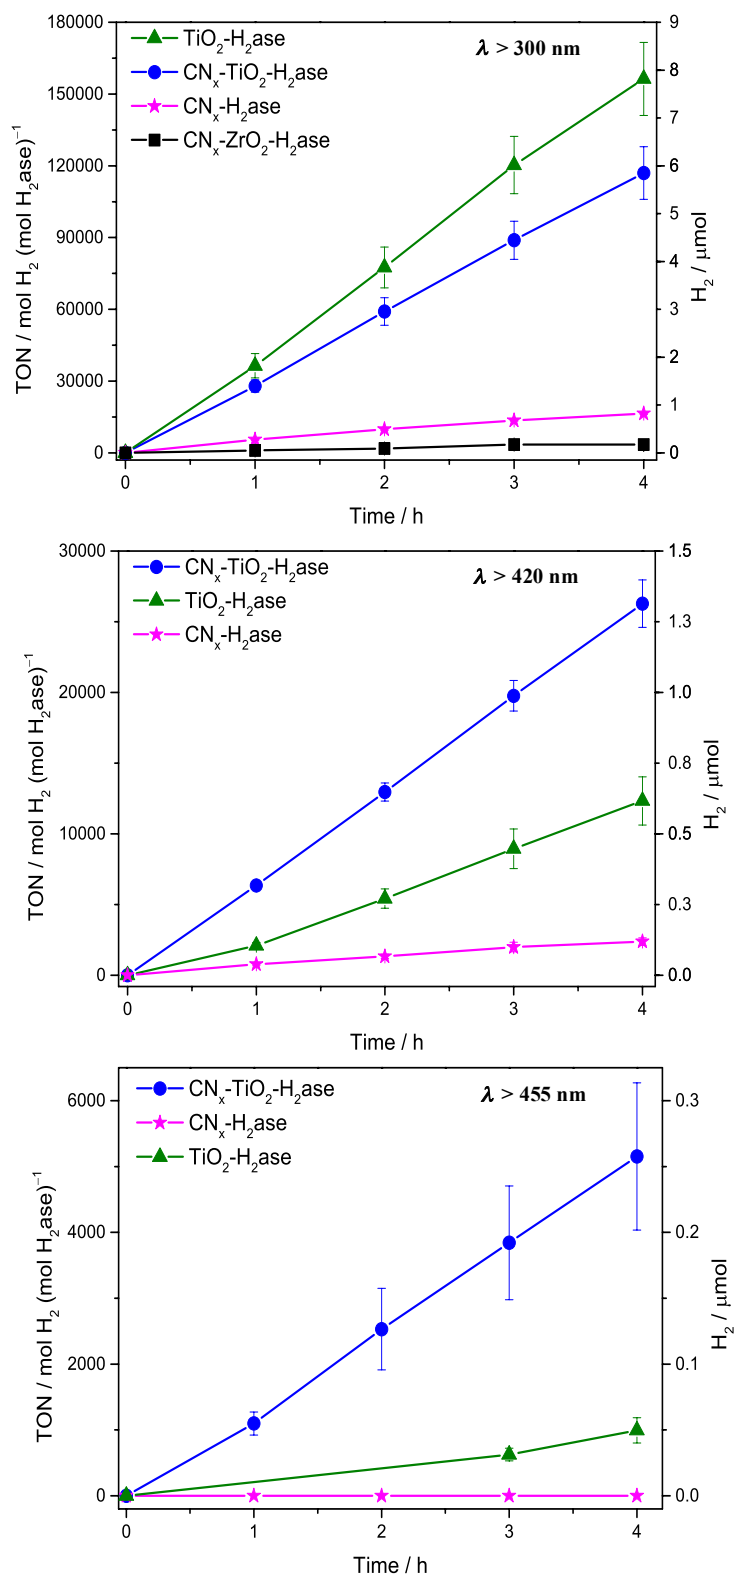

**Figure S4.**  $\text{H}_2$  production under optimised conditions using *Dmb* [NiFeSe]- $\text{H}_2\text{ase}$  (50 pmol) in EDTA (pH 6, 0.1 M, 3 mL) and  $\text{CN}_x\text{-TiO}_2$ ,  $\text{TiO}_2$ ,  $\text{CN}_x$ , (5 mg) or  $\text{CN}_x\text{-ZrO}_2$  (15 mg) under 1 sun irradiation with  $\lambda > 300 \text{ nm}$ ,  $\lambda > 420 \text{ nm}$  and  $\lambda > 455 \text{ nm}$  light. Note that the amount of  $\text{H}_2$  was below the detection limit after the first 2 h at  $\lambda > 455 \text{ nm}$  with  $\text{TiO}_2\text{-H}_2\text{ase}$ .

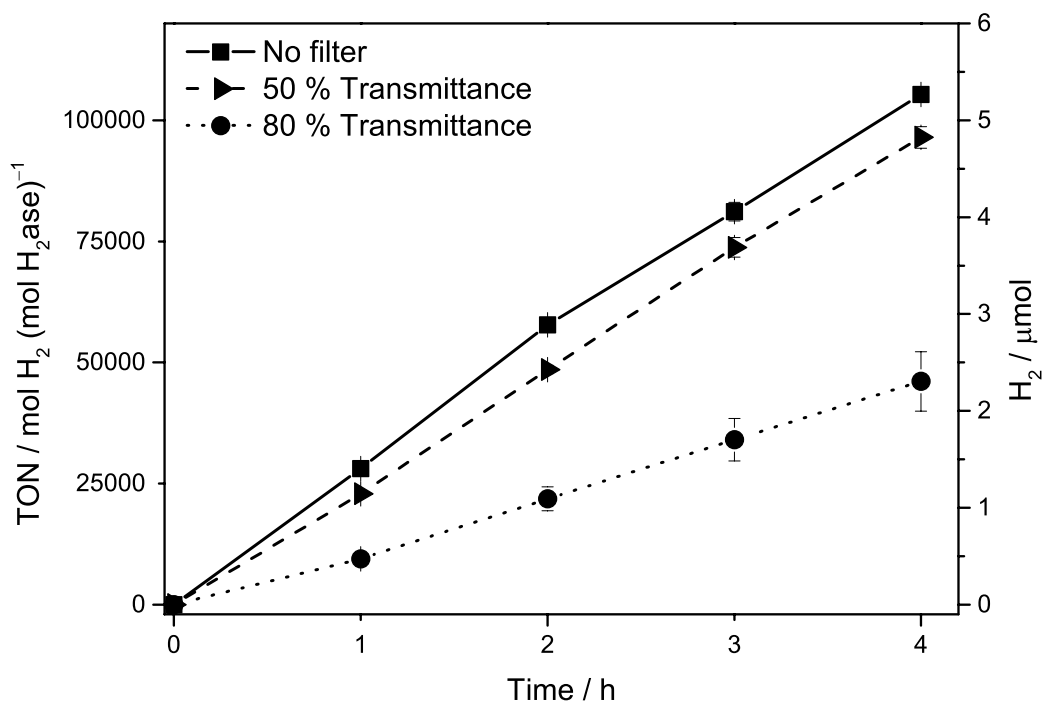

**Figure S5.** Photo-H<sub>2</sub> production using CN<sub>x</sub>-TiO<sub>2</sub> (5 mg) in aqueous EDTA solution (0.1 M, pH 6) with *Dmb* [NiFeSe]-H<sub>2</sub>ase (50 pmol) under 1 sun irradiation (100 mW cm<sup>-2</sup>, λ > 300 nm, 25 °C) with the addition of different neutral density filters absorbing 50% and 80% of the incident light.

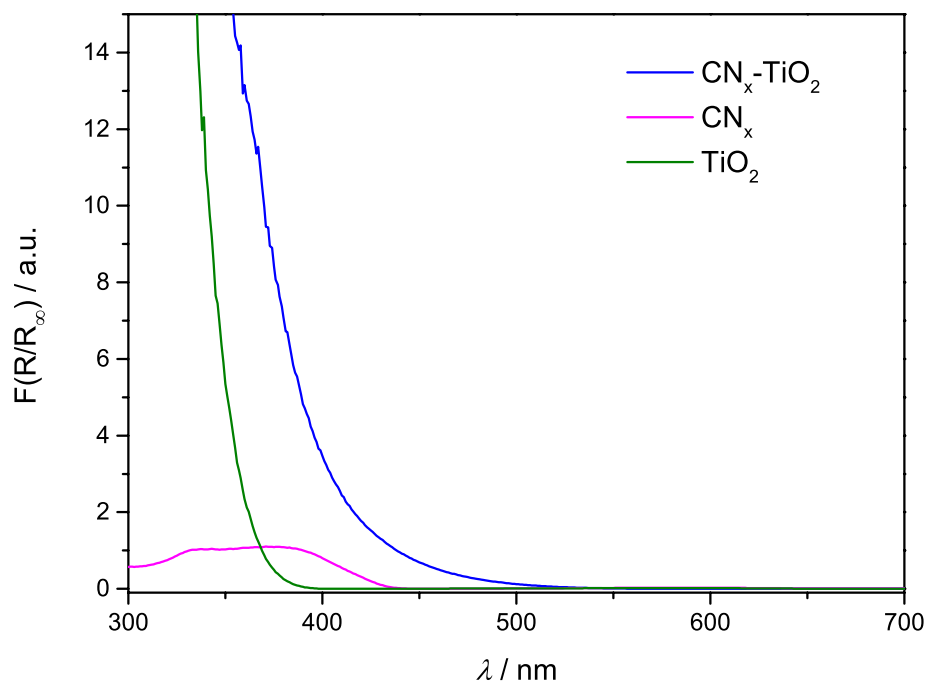

**Figure S6.** Diffuse reflectance UV-vis spectrum of CN<sub>x</sub>-TiO<sub>2</sub>, CN<sub>x</sub> and TiO<sub>2</sub>.

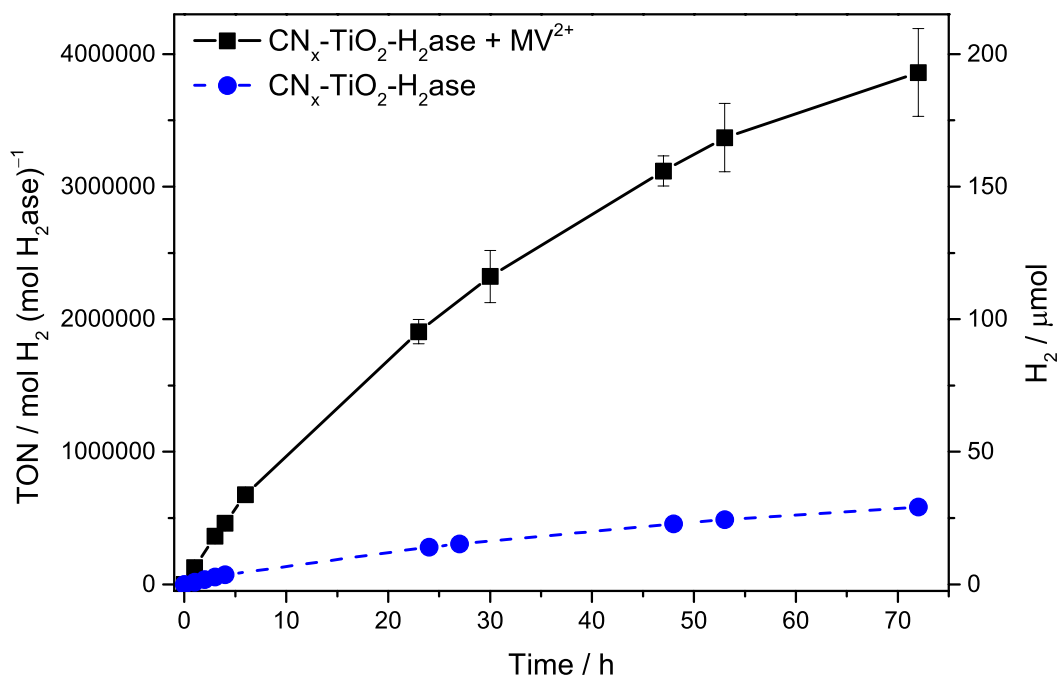

**Figure S7.** Long-term photo-H<sub>2</sub> production with *Dmb* [NiFeSe]-H<sub>2</sub>ase (50 pmol) and CN<sub>x</sub>-TiO<sub>2</sub> (5 mg) in aqueous EDTA solution (0.1 M, pH 6) in the presence and absence of methyl viologen (MV<sup>2+</sup>; 5 μmol) under solar light irradiation (1 sun, 100 mW cm<sup>-2</sup>, λ > 300 nm) at 25 °C.

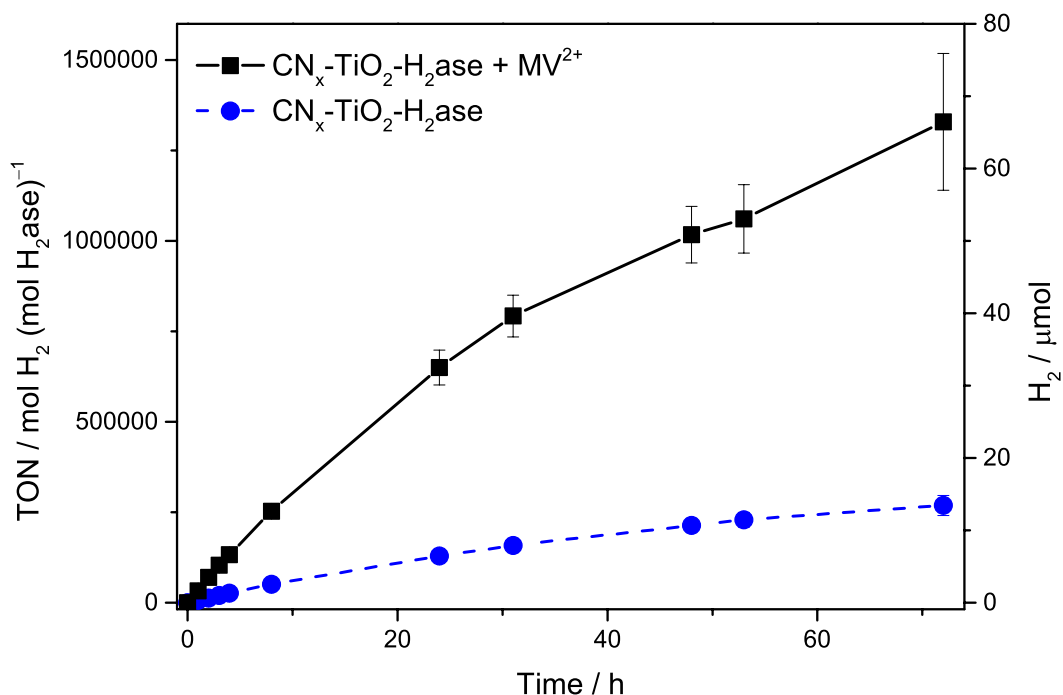

**Figure S8.** Long-term photo-H<sub>2</sub> production with *Dmb* [NiFeSe]-H<sub>2</sub>ase (50 pmol) and CN<sub>x</sub>-TiO<sub>2</sub> (5 mg) in aqueous EDTA solution (0.1 M, pH 6) in the presence and absence of methyl viologen (MV<sup>2+</sup>; 5 μmol) under visible light irradiation (1 sun, 100 mW cm<sup>-2</sup>, λ > 420 nm) at 25 °C.

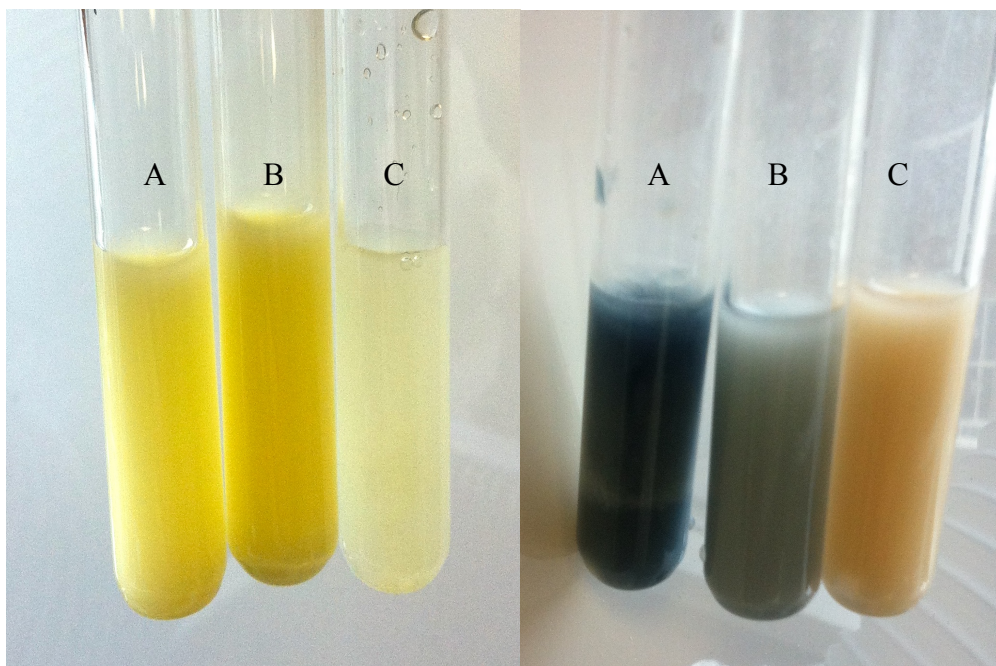

**Figure S9.** Colour of suspensions of (A)  $\text{CN}_x\text{-TiO}_2\text{-H}_2\text{ase} + \text{MV}^{2+}$ , (B)  $\text{CN}_x\text{-TiO}_2\text{-H}_2\text{ase}$ , (C)  $\text{CN}_x\text{-H}_2\text{ase}$  before (left) and after 72 hours of solar light ( $\lambda > 300 \text{ nm}$ ) exposure (right).

End of ESI
